# Supplementary material for: Patterns of Psychoactive Substance Misuse in Undergraduate University Students: The Case of Mekelle University, Ethiopia
Source: MDPI journal article supplement (doi:10.3390/challe13020054), 2022-10-25
Supplement: s1 [file s1]

## Codes-quotations list

### Code-Filter: Code Family "2\_Conveneient time and place to use substance"

HU: PASA atlas January 18-2018  
File: [C:\Users\user\Desktop\PASSA quali\_recent\PASA atlas January 18-2018.hpr7]  
Edited by: Super  
Date/Time: 2018-01-20 12:18:33

#### Code: SU\_ how to use suabtnc[ in Group Vs Individually] {6-0}

##### P 2: 10\_M\_IDI\_Male non user BC.docx - 2:43 [??? ?? ???? ???? ???? ???? ?..] (54:54) (Super)

Codes: [SU\_ how to use suabtnc[ in Group Vs Individually] - Family: 2\_Conveneient time and place to use substance] [SU\_ Place to get the substances - Family: 2\_Conveneient time and place to use substance] [SU\_ Place to use substances - Family: 2\_Conveneient time and place to use substance]  
No memos

ፅብቅ ሐዚ ትክክል ከከም ዓይነቶም ይፈላላዩ እዮም ሲጋራ እንተኾይኑ ጉጅለ ምፍጣር አየድልን በይኑ እዩ ዘድሊ እንዲያም ካብቲ ዓይነት ሱስ ንባዕሉ ሱቅ ኢልካ ብግልካ ነገር ዝምቹ ምኽንያት ኣብቲ ዘይኮነ ሙድ ዝኣትዉ ሓቀይ ሐዚ ዘይሰትዩ ፀኒሓም ገለ ባህሪኦም ፅብቅ ኣይኮነን ግዛፅ ምዚኦም ኩሉ ነገርም ድሕሪ ኣብ ዝኾነ ግላሳ ኮይኖም ክስህቡ ደስ ይብሎም በይኖም ሱስ ኣብ ዘይብሎም ሱቅ ኢሎም ኢካ ትሪኦም፡፡

##### P 2: 10\_M\_IDI\_Male non user BC.docx - 2:44 [??? ??? ? ? ???? ???? ? ? ?..] (54:54) (Super)

Codes: [SU\_ how to use suabtnc[ in Group Vs Individually] - Family: 2\_Conveneient time and place to use substance]  
No memos

ካብኡ እተን ግን ሐዚ ንኣብነት ብርግፅ ምስ ሰባት ኮይኖም ክስሕቡ ይኽእሉ እዮም ሙብዛህትኡ ግዜ ከምኡ እዩ ዝምቹዎም፡፡

##### P 2: 10\_M\_IDI\_Male non user BC.docx - 2:45 [??? ??? ???? ? ? ? ? ? ? ? ? ?..] (54:54) (Super)

Codes: [SU\_ how to use suabtnc[ in Group Vs Individually] - Family: 2\_Conveneient time and place to use substance]  
No memos

ኣንቲ ሲጋራ ዝስህቡላ ግዜ ኣብታ ሰዓት ንሳ ንበይኖም እያ ትዕድሞም፡፡ ዝኾነ ነገር ኣለዎም እንድዕይ ውሽጦም ዝስመዎም ነገር ይሕልዎም ግን ከምኡ እዩ ዝዕዘቡ፡፡ ካብኡ እዞም ጫት ግን ጫት በይንኻ ኣይቃሓምን ዳርጋ በሓዲሩ እቲ ዓይነት ሱስ ብGroup እዩ፡፡

##### P 2: 10\_M\_IDI\_Male non user BC.docx - 2:47 [?? ??? ???? ???? ???? ? ? ?..] (54:54) (Super)

Codes: [SU\_ how to use suabtnc[ in Group Vs Individually] - Family: 2\_Conveneient time and place to use substance]  
No memos

ጫት እውን ብግራም ልመዓልቲ ከአልኒ ፅባሕ ኣነ ከክለካ እናተባሃሉ ብባሕሪኦም እቶም ሰባት እውን ተሓጋገዙቲ እዮም፡፡ ሎምዓንቲ ኣነ ከአለካ ፅባሕ ንስካ ትክእለኒ እናተባሃሉ ንጫት ማለት እዮ፡፡ ሺጋራ ምንም Affordable እዩ ባዕሎም ከገዝኡ ይክእሉ እዩም፡፡

##### P 2: 10\_M\_IDI\_Male non user BC.docx - 2:49 [??? ?? ? ? ???? ? ? ???? ???? ?..] (58:58) (Super)

Codes: [SU\_ how to use suabtnc[ in Group Vs Individually] - Family: 2\_Conveneient time and place to use substance]  
No memos

መስተ ከዓ ከከም ኩነታቱ ሸዚ ንኣብነት ሙብዛሕትኡ ግዜ እንተኢልካ ብሓደ ኮይኖም እዮም ዝስትዩ፡፡ ወይም ብፆታ ወይ ከዓ ክብለካስ ጋል ኣንስተይቲ እውን እንተኮይና ሒዝካያ ትኸይድ ወይ ከዓ በባይንካ ክትሰቲ ትክእል ኢኻ ግን ሓደ ሓደ ሻዕ ፅብቅ ኣብ ዘይኮንካሉ ግዜ በይኖም ክስትዩ ይኽእሉ እዮም ወይ ከዓ ቅርሺ ዘይብሎም እንተኾይኖም ሸቱኽ ኢሎም ክስትዩ ይኽእሉ እዮም፡፡ ግን ሱቅ ኢሎም ከነ ኢሎም ክስትዩ እንተከይዶም ግን ብሓበር እዮም ዝስትዩ፡፡

**P24: 9\_IDI\_Female proctor Ayder.docx - 24:18 [???? ???? ? ? ???? ?] (62:62) (Super)**

Codes: [SU\_ how to use suabtnc[ in Group Vs Individually] - Family: 2\_Conveneient time and place to use susbstance]  
No memos

ለየብቻም በቡድንም ነው የሚቅሙት።

---

**Code: SU\_ Place to get the substances {11-0}**

**P 1: 1\_Female Users FGD in Business college.docx - 1:7 [?? ?? ?? ??? ??? ???? ???? ?..] (35:35) (Super)**

Codes: [SU\_ Place to get the substances - Family: 2\_Conveneient time and place to use substance]  
No memos

አዎ አለ ጫት ቤቶች ውስጥ ይገኛል እንዲሁም ድብቅ ቤቶች መንግስት የማያወቃቸው መኖርያ ቤት መስለው እዛ ተማሪዎች ይገባሉ አለ በብዛት ተማሪ እዛ ይኖራል።

**P 1: 1\_Female Users FGD in Business college.docx - 1:8 [?? 5:- ???? ??? ? ???? ???? ?..] (37:37) (Super)**

Codes: [SU\_ Place to get the substances - Family: 2\_Conveneient time and place to use substance]  
No memos

ኮድ 5- በአሁን ሰዓት ላይ ብዙዎቹ በቀላሉ ማግኘት ይቻላል በምሳሌ ጫት ሲጋራ በማንኛውም ሱቅ ይሸጣል። ጫትም በብዛት ቦታዎች አሉት መጠጠጥም በብዛት አለ። ለምሳሌ በግቢያችን አቅራቢያ በሚገኙ ግሮሰሪዎች ምናምን እና ብዙዎች በቀላሉ ማግኘት ይቻላል።

**P 2: 10\_M\_IDI\_Male non user BC.docx - 2:43 [??? ?? ???? ??? ???? ???? ?..] (54:54) (Super)**

Codes: [SU\_ how to use suabtnc[ in Group Vs Individually] - Family: 2\_Conveneient time and place to use substance] [SU\_ Place to get the substances - Family: 2\_Conveneient time and place to use substance] [SU\_ Place to use substances - Family: 2\_Conveneient time and place to use substance]  
No memos

ፅብቅ ሐዚ ትክክል ከከም ዓይነቶም ይፈላለዩ እየም ሲጋራ እንተኾይኑ ጉጅለ ምፍጣር አየድልን በይኑ እዩ ዘድሊ እንዲያም ካብቲ ዓይነት ሱስ ንባዕሉ ሱቅ ኢልካ ብግልካ ነገር ዝምቹ ምክንያት ኣብቲ ዘይኮነ ሙድ ዝኣትዉ ሓቀይ ሐዚ ዘይሰትዩ ፀኒሑም ገለ ባህሪኡም ፅብቅ ኣይኮነን ግዛዕ ምዚኡም ኩሉ ነገሮም ድሕሪ ኣብ ዝኾነ ግላሳ ኮይኖም ክሰህቡ ደስ ይብሎም በይኖም ሱስ ኣብ ዘይብሎም ሱቅ ኢሎም ኢካ ትሪኦም።

**P 4: 12\_Male KIR\_BC\_round .docx - 4:8 [??? ???? ? ? ? ? ? ? ? ? ? ? ?..] (9:9) (Super)**

Codes: [SU\_ Place to get the substances - Family: 2\_Conveneient time and place to use substance]  
No memos

ከዚህ በተጨማሪ ሌላው ሀሺሽ ሀሺሽ ደሞ እዚህ አከባቢ ካሣቴ የሚባል አለ ኤማ ጌታቸው የሚባሉ እነዚህን ነገሮች የሚያቀርቡ ሰዎች አሉ

**P 4: 12\_Male KIR\_BC\_round .docx - 4:9 [?? ???? ???? ? ? ? ? ? ? ? ? ? ? ?..] (9:9) (Super)**

Codes: [SU\_ Place to get the substances - Family: 2\_Conveneient time and place to use substance]  
No memos

ሌላ ትንባሆ ስለትንባሆ ብዙም ተጠቃሚ ያን ያክል ግልፅ የሆነ ተጠቃሚ ያወቅኩት ሰው የለም ግን አንድ በቃ የሆነ ሰው አንድ አግኝቼ ነበር እና እሱን አናግሬው ነበረ እኔ... ትንባሆን ብቻውን አይጠቀምም መገዳእ እና ትንባሆ አቀላቅሎ የሚጠቀም ሰው ነበር እሱም የሚያገኘው ከከተማ ሂዶ ነው።

**P 6: 14\_X\_FGD male non-user at Ayder docx.docx - 6:26 [???? ? ? ? ? ? ? ? ? ? ? ? ? ?..] (39:39) (Super)**

Codes: [SU\_ Place to get the substances - Family: 2\_Conveneient time and place to use substance]  
No memos

በርግጥ ስለ ስጋራ እንኳን በዚህ በፊት ይታወቃል ጫት ግን almost ወደ ገበያ እየገባ ነው ከዚ በፊት ደህና ነበር አሁን እያንዳንዱ የጫት ቤት ተብሎ ይፃፋል ከታችም ከላይም አለ እና ከዛ እየገቡ እየተጠቀሙ ነው በይበልጥ ደግሞ የራሳቸው የሚያውቃቸው በታዎች አለ-እዛ ሂደው ይጠቀማሉ አንድ አንድ ግዜ እዛ ተጠቅሞ ይዘው የሚገቡ አሉ

**P 6: 14\_X\_FGD male non-user at Ayder docx.docx - 6:30 [??? ??? ??? ?? ????? ?? ?????? ..] (39:39) (Super)**

Codes: [SU\_ Place to get the substances - Family: 2\_Conveneient time and place to use susbstance]  
No memos

አሁን ሶርሱ በጣም ብዙ ስለሆነ ያው እያንዳንዱ በሱቅ ስላለ መግዛይ ይችላሉ ሲጋራ እንኳን የታወቀ ነው በያንዳንዱ ድኳን ስለሚሸጥ እና አብዛኛው ሁለቱም ነው የሚጠቀሙት እንጂ ያው እንደተባለው ሶስተኛው ሃሺሽ እንኳን በጣም የለመዱ እና ከዚህ በፊት የሚጠቀሙ ካልሆነ በስተቀር እነዚህም ወደዛ መሄዳቸው አይቀራቸውም ግን ስላላየናቸውም ሊሆን ይችላል ዝርዝር ግንኙነታቸው ግን ሁለቱም ::

**P 7: 15\_X\_IDI\_Male proctor Ayder.docx - 7:9 [???? ??? ??? ?? ????? ?? ??? ??..] (16:16) (Super)**

Codes: [SU\_ Place to get the substances - Family: 2\_Conveneient time and place to use substance]  
No memos

ይህንን ሲጋራ ቀላል ነው ላይኛው በር ሱቆች አሉ ከዛ ነው የሚያገኙት ጫት እንኳን በአብዛኛው ከከተማ ነው እዚህ ብዙ አላቅም ግን ዓይደር ታችኛው ሰፈር ውስጥ የተወሰኑ አሉ ይላሉ::

**P 9: 17\_Male User\_Adihaki campus.docx - 9:14 [???? ?? ??? ??? 8-10 ?? ??? ??..] (28:28) (Super)**

Codes: [SU\_ Place to get the substances - Family: 2\_Conveneient time and place to use substance]  
No memos

ደረፍር ጫት ቤቶች መነር 8-10 ጫት ቤቶች ሲጋራ -በየሱቁ ይገኛል

**P10: 18\_KIR 1\_ 1st interview\_Busness campus\_mekelle univeristy.doc - 10:2 [??? ?? ?? ????? ????? ????? ??-??..] (5:5) (Super)**

Codes: [SU\_ Place to get the substances - Family: 2\_Conveneient time and place to use substance]  
No memos

አዎት የተ የት ይገኛሉ ለሚለው ማርያም ቤተ-ክርስቲያን አካባቢ በእቃ ነገር በወረቀት ይሰጣቸዋል:: እዛ አካባ አለ:: የሆነ እንደ ..... ማት ነው:: አየኝ አላየኝ ተብሎ ነው የሚገዛው ሃሺሽ:: እዚህ መጠጥ ቤቶችም አለ ከዛ በተጨማሪ ግን ከከተማ ማርያም አካባቢ ዋና ቦታ የሚቀበሉበት ቦታ መሆኑን አሁን አዲስ ነገር ያገኘሁት አለ::

**P24: 9\_IDI\_Female proctor Ayder.docx - 24:16 [?? ??? ?????? ??? ?? ?? ??????..] (59:59) (Super)**

Codes: [SU\_ Place to get the substances - Family: 2\_Conveneient time and place to use substance]  
No memos

በቃ ሲጋራ የሚጠቀሙት ከሱቅ ነው ውጭ እንደምታየው ነው፤ በቃ ሲጋራ የሚጠቀሙት ከሱቅ ነው ውጭ እንደምታየው ነው ለጫት ልዩ የመሸጫ ቦታ አለው፤ እዛ ተጠቅመው ይገባሉ ወይም ይዞ መጥተው ዶርም ይጠቀማሉ ብዙ የሚሸጥበት ቦታ አለ ውጭ ማለት ነው::

---

**Code: SU\_ Place to use substances {20-0}**

**P 2: 10\_M\_IDI\_Male non user BC.docx - 2:43 [??? ?? ????? ??? ?????? ?????? ??..] (54:54) (Super)**

Codes: [SU\_ how to use suabtnce[ in Group Vs Individually] - Family: 2\_Conveneient time and place to use substance] [SU\_ Place to get the substances - Family: 2\_Conveneient time and place to use substance] [SU\_ Place to use substances - Family: 2\_Conveneient time and place to use substance]  
No memos

**P 6: 14\_X FGD male non-user at Ayder docx.docx - 6:23 [???? ??? ??? ?????? ??? ??? ??..] (33:33) (Super)**

Codes: [SU\_ Place to use substances - Family: 2\_Conveneient time and place to use susbstance]  
No memos

በተለይ አብዚ አላች ከላይ-በረራ ብሃላ ያላች ሽንት ቤት ከላይ ሲጋራ ይገኛል በብሎክ በላይ እዛ ግን አለ የሲጋራ ትርፍራፊ ይገኛል ከብሎክ ብሃላምም የቢራ ስብርባር እዛ እናገኛለን የወደቀ ልብስ ስናነሳ ስንሄድ እዛ የተሰባረረ እናገኛለን እሱ የሚያሳየው ምንድን ነው እያስገቡ ነው የአልኮል መጠጥ እየገባ መሆኑን በግቢ እየገባ ነው

**P 6: 14\_X\_FGD male non-user at Ayder docx.docx - 6:35 [???? ???? ? ???? ???? ? ? ????..] (45:45) (Super)**

Codes: [SU\_ Place to use substances - Family: 2\_Conveneient time and place to use susbstance]  
No memos

አልኮል ሲጠቀሙ ግን አልኮል እዚህ ግቢ አያገቡም ብዙን ግዜ አያገቡም አይገባም ማለት አንድ አይፈቀድም ስያገቡም እንዳለው ትንሽ ጅን ካልሆነች በስተቀር የሄ ቢራ ምናምን ሊገባ አይችልም ማለት እዛ መጠጣት ነው የሚሻለው ለራሳቸው ራሱ

**P 6: 14\_X\_FGD male non-user at Ayder docx.docx - 6:74 [?????? ? ???? ? ? ? ? ? ? ? ? ? ?..] (106:106) (Super)**

Codes: [SU\_ Place to use substances - Family: 2\_Conveneient time and place to use susbstance] [Substance used\_ Ciggarate - Family: 1\_Commonly used substances among univeristy students]  
No memos

አንድአንድ ግዜ ሳንዱች ቤት አላች እዛ እጠቀማለሁ ማታማታ ሳንዱች እጠቀማለሁ እና እዛ ጋር በሄድኩበት ቀን አንድ ሰው በአንዴ ሁለት ሲጋራ አጭሶ ነው የሚመለሰው አንድዋን ይለኩሳትና አንድዋ ጨርሶ ይወጣል በቡድን ነው ደግሞ 4 ወይም 3 የሚመጡት እና በቡድን ሁነው የሚመጡት ለብቻው የሚመጣ አላየሁም እናበቡዱን ሁነው አንድዋ ጨርሶ አንድዋ ጥሎ መታማታ ብዙ የሚጠጠቀሙ ነው የሚመስለኝ

**P 6: 14\_X\_FGD male non-user at Ayder docx.docx - 6:80 [???? ? ???? ? ? ???? ? ? ? ?..] (117:117) (Super)**

Codes: [SU\_ Place to use substances - Family: 2\_Conveneient time and place to use susbstance]  
No memos

አብዛኛው ቦታ የሚጨሰው ቦታ በዚህኛው አንድ አላት ቦታወጭ የሆነ ቦታ ይታወቃል ቦታ በዚህኛው በሄድንበት የዚህኛው እንትን class እና ወደ green area ላይ አለ እዚህ ላይ ማታ አሁን ብንሄድ ነፍ ቦታ packate ciggara ሲጋራ መለት ነው

**P 6: 14\_X\_FGD male non-user at Ayder docx.docx - 6:81 [?? ? ? ? ? ? ? ? ? ? ? ? ? ? ?..] (117:117) (Super)**

Codes: [SU\_ Place to use substances - Family: 2\_Conveneient time and place to use susbstance]  
No memos

ማታ ስትሄ ደሞ ስትሄድ ራሱ ተማሪነው ወይስ ለማወቅ አስቸጋሪ ነው ለማወቅ አንድአንዴ ተማሪ ነው ብለህ ስትሄድ ያለ ተማሪ ሁኖ ታገኛለህ ተማሪ ሁኖ ከእንትን ከአስታማሚዎች ተደብቆ ታገኝሃለህ እና ቦታ እነዚህ ደሞኒ ልትጠይቃቸው ስትሄድ ሌሎችም ቦታ ማለት ካንተም በላይ ካንተበላይ በሁሉም ነገር ስለዚህ አንተ የራስህ አላማ አለብህ እነሱም የራሳቸው አላማ አላባቸው ቢያንስ ተማሪ ቢሆን ራሱም ሂወቱ መቀየስ ስለአለበት ነግረህ ብለህ ግዜህን ወይም ሰውተህ እንትን ታደርጋለህ ሌላሁኖ ስታገኘው ግን ለራስህ ተመልሶrisk ነው ስለዚህ ቦታ የንሽርስቲው ከሆስቲታሉ ራሱ እንትን ማድረጉ በጣም ትልቅ infulence አለው

**P10: 18\_KIR 1\_ 1st interview\_Busness campus\_mekelle univeristy.doc - 10:3 [????? ? ? ? ? ? ? ? ? ? ? ? ? ? ..] (7:7) (Super)**

Codes: [SU\_ Place to use substances - Family: 2\_Conveneient time and place to use susbstance]  
No memos

በአልኮል ደግሞ አልኮል እዚህ አካባቢ በሽ ነው ብለናል :: አሁን ደግሞ በተለዩ መንገድ ግቢ ውስጥም የመግባት ጫትም ወደ ግቢ ያዞ መግባት አሁን ላይ በጣም ተስፋፋቷል:: ተማሪው ይዞ ይገባል ዶርም ነው ሁሉም ነገር የሚያደርገው ቀን ላይ::

**P10: 18\_KIR 1\_ 1st interview\_Business campus\_mekelle univeristy.doc - 10:4 [I ?? ?? ???? ???? ???? P ??..] (8:9) (Super)**

Codes: [SU\_ Place to use substances - Family: 2\_Conveneient time and place to use substance]  
No memos

፤ ወደ ግቢ የሚገቡ ዕቃዎች ምድን ናቸው?

የ ሶስቱም ናቸው አልኮል፣ ጫት፣ እና ሐሺሽ ማለት ነው። ጫት እንደ የራሱ ቦታ አለው። ማለት ከሚጠቀሙበት ውጭ ባያቀውም ማት ነው። ሲጋራ እና አልኮል ደግሞ አለ ማታ ማታ ነው አልኮል በመያዝ ኮከ በሚመስሉ መያዣዎች እንደ ወይን ያሉትን ያስገቧቸዋል። እዚህ ግቢ ውስጥም ማለት ነው። እንደዚህ የሚሆነው ከአራት ሰዓት በፊት ማግኘት ስለሚኖርብህ ማለት ነው ውጭ መቆየት ወይም ማደር የማይችል ከሆነ ነገሮቹን ይዞ ይገባል ማለት ነው።

**P10: 18\_KIR 1\_ 1st interview\_Business campus\_mekelle univeristy.doc - 10:5 [???? ????? ???? ???? ???? ?..] (11:11) (Super)**

Codes: [SU\_ Place to use substances - Family: 2\_Conveneient time and place to use substance]  
No memos

እነዚህ የለስላሳ መልክ ያላቸው መጠጦች ናቸው በለስላሳ መያዣ የሚገቡት። እና ደግሞ የሴቶች መግያ በር ላይ ፍተሽው የተጠናከረ አይደለም እንደዚህ በጃኬት ውስጥ ይዘውት ይገባሉ። ሁሉም በደንብ ስለማይፈተሹ ሴቶች አራት ሰዓት ላይ በር የሚዘጋበት ግዜ ስለሆነ የሴቶች ጥበቃ በጣም ጥብቅ አይደለም። ስለዚህ ይዘው የመግባት እድል አላቸው።

**P10: 18\_KIR 1\_ 1st interview\_Business campus\_mekelle univeristy.doc - 10:6 [I ????? ???? ?? ????? ????? ????..] (12:13) (Super)**

Codes: [SU\_ Place to use substances - Family: 2\_Conveneient time and place to use substance]  
No memos

፤ እነዚህ ዕጾችን ይዞ ለመግባት በአይንሽ ያየሽው አጋጣሚ አለ?

የ አዎ። ወንዶች ይዘው ሲገቡ አይቻለው። ሴቶች ደግሞ ከዚህ በፊት ጠላ ይዘን እንግባ ሲባባሉ እና ይዘው ሲገቡ አውቃለሁ። ባለፈው ደግሞ እዚህ ግ ውስጥ ና ይዣለሁ እንጨብስ ሲባባሉ አይቻለሁ።

**P12: 2\_M\_FGD\_Male user\_BC .docx - 12:21 [??? ???? ???? ???? ???? ?..] (40:40) (Super)**

Codes: [SU\_ Place to use substances - Family: 2\_Conveneient time and place to use substance]  
No memos

አሁን ከሲጋራ ከመጠጥ ከጫትና ከሌሎች ሱሶች መች መች ነው የሞተጠቀሙት ለማለት ሲጋራ አንደኛ በመጠንም ትንሽ ናት ሲቀጥል ደግሞ በቅርብ ልኛገናት እንችላለን ወደዚህ መጥተን ወይም ዳግም ግቢ ውስጥ ይዞ እየተገባ ዶርም ዶርም ሂጄ ፈልጌ ሴሽ አላችሁ ብዮ ተፈተፈበዮ ላገኝ እችላለሁ ሌላው ግን በመጣንም ቢሆን ተለቆ ለሚል ለመያዝ አይችልም ወደ ሌላ ቦታ አምጡት ለማለትም ስለማይመች የግድ ከተማ መውረድ አለብኝ

**P12: 2\_M\_FGD\_Male user\_BC .docx - 12:22 [????? ???? ?? ??? ??? ??? ?..] (40:40) (Super)**

Codes: [SU\_ Place to use substances - Family: 2\_Conveneient time and place to use substance]  
No memos

ለሲጋራና ለሌሎች ግን ቀላል ላሉት እዚህ ስፓት ዘፍርስ የማጨሽ ቦታ ወይ ግቢ ውስጥ ተፈተፈ ማለት ነው ይሄ ቦታ በኛ አጠራር ስፓት ወይም ጃንግል ነው ሚባለው ስፓት አዎ የሱስኛ መቀመጫ ቦታው ስፓት ነው ብዙን ጊዜ በዚህ ብቻ ሳይሆን በሌላም ከንቴክስት ስፓት የሚባለው ጭር ያለ ቦታ ትንሽ ዛፍ ይበዛበታል እና እነዚህ ቁጭ ቁጭ ማለት ዲንጋይ ካባ ይገናል በቃ ከዛ ተከብ ነው የሚደረገው መቸም አንድ ሰው ብቻውን የሚፈጥረው አይደለም የሆነ ጅምጻ ሆኖ ነው

**P19: 4\_IDI\_ Male user BC.docx - 19:23 [??? ????; ?? ;???; ???? ?? ??? ?..] (70:70) (Super)**

Codes: [SU\_ Place to use substances - Family: 2\_Conveneient time and place to use substance]  
No memos

ናቸው ሲጋራ፣ ጫት ፣ሺሻ፣ ሓሺሺም አለ ሲባል የምንሰማው መሰማት ብቻም ሳይሆን ይዘው ሲገቡ ተይዘው የተባረሩም አሉ already:: እና ከዚህ ውጭ እከሌ ተባረረ፣ እከሌ ይዞ ገባ፣ እከሌ ተፈትሾ ተገኘበት ተባረረ ሲባል ነው የምንሰማው እንጂ ከዚህ ውጭ ሌሎች ያሉ አይመስለኝም::

**P24: 9\_IDI\_Female proctor Ayder.docx - 24:19 [??? ?? ?? ????? ?? ????? ?????..] (65:65) (Super)**

Codes: [Consequences of substance use: Legal issues - Family: 7\_Experience of consequences of substance use] [SU\_ Place to use substances - Family: 2\_Convenient time and place to use substance]

No memos

ዘበኛ አለ ግን እየሸውዱ ነው የሚሆነው የሚመስለኝ ልብስ አሳጥበው ሲያስገቡ፤ በተለየ የደዓ ዘዴ ተጠቅመው ያስገባሉ::

**P24: 9\_IDI\_Female proctor Ayder.docx - 24:20 [??? ?? ????? ?? ????? ?? ..] (68:68) (Super)**

Codes: [SU\_ Place to use substances - Family: 2\_Convenient time and place to use substance]

No memos

አሁን ምን መሰለህ ምግብ አለ የተማሪዎች ይዘው የሚገቡት ብዙ ነው ይዘው የሚገቡት እኛ ደግሞ ምድጃ እንዳይጠቀሙ እየገባን እናረጋግጣለን ምክንያቱም ምድጃ ሊያቃጥላቸው ስለሚችል፤ ስለዚህ ምግብ በዶርም ማብሰል የለባቸውም ግን ምንድነው አሁን ወተት አለ ቀዝቃዛ ነው የምንጠጣው ይሉሃል፤ ልክ ይህንን እንደሚያረጉት ሁሉ አልኮልም ሊሸውዱን ይችላሉ አንተ በጥንቃቄ ካልተከታተልከው ይዘው ሊገቡ ይችላሉ፤ ሽውደው ሊገቡ ይችላሉ እንጂ የበሰለ ምግብ ነው እያሉ ይሸውዱሃል አስቸጋሪ ናቸው::

**Code: SU\_ Time to use subatnce- Afternoon {7-0}**

**P 1: 1\_Female Users FGD in Business college.docx - 1:9 [1:-???? ?/? ?? ????? ??? 9 ..] (39:39) (Super)**

Codes: [Motivators for substance use- Excessive free time - Family: 3\_Motivating factors for substance use] [SU\_ Time to use subatnce- Afternoon - Family: 2\_Convenient time and place to use substance]

No memos

1-አሁን ለምሳሌ ት/ት ቤት እያለን እስከ 9 ሰዓት ት/ት ነን ስለዚህ ከ9-30 በኋላ ነው::እዚህ ግን 2-30-4-30 ከዛ በኋላ ነፃ ነን:: የ2 ሰዓት ብቻ ሊሆን ይችላል የሚኖረን እሱም ላይኖር ይችላል:: እና ሙሉ ቀን ዶርም ወስጥ ቁጭ ማለት ነው::ግቢዉ ዉስጥ ደግሞ ምንም የተዘጋጀ ነገር የለመ ተማሪዉ ሊያሳልፍባቸዉ የሚችሉ::ስለዚህ አብዛኛዉ ሰዓታችን ነፃ ነን

**P 2: 10\_M\_IDI\_Male non user BC.docx - 2:40 [?? ??? ?? ?? ??????? ?? ????? ..] (51:51) (Super)**

Codes: [SU\_ Time to use subatnce- Afternoon - Family: 2\_Convenient time and place to use substance]

No memos

ጫት ከዓነ ጫት ሐዚ መብዛሕቲኦም መዓዝ ይስሕቡ እንተሊካ ድሕሪ ሰዓት ምሳሕ በሊዶም ከይዶም ጫት ንጉሆ አይጥቀሙን ካብ ምሳሕ ሰዓት ንድሐር ከይዶም ኮፍ ኢሎም ቅሒሞም ምስይሽይ ክብል ከሎ ይመጡ:: ደሐር ገለ ገለኦም ከዓ ኮፍ ኢሎም ዝሓድሩ እንሄው ሱቅ ኢልካ ብግሊ እምብር እቶም ብGroup ዝኸዱ ሐዚ መብዛሕታኡ ግዜ ምሳሕ በሊዶም ይኸዱ::ምሳሕ በሊዶም ይኸዱ ደሐር ኢጋ ምሽት ከባቢ ይምለሱ ማለት እየም::

**P 3: 11\_M\_IDI\_Male nonuser BC.docx - 3:2 [?????? ??? ?? ??? ?? ??? ??? ?..] (14:14) (Super)**

Codes: [SU\_ Time to use subatnce- Afternoon - Family: 2\_Convenient time and place to use substance]

No memos

አብዛኛውን ሰዓት ምስ ሰዓት ላይ ይሄን ነገር በጣም ያዘወትራሉ አብዛኛው ማለቴ የጫት ሰዓት ጫት በጫም የሚቅሙት ምስ ሰዓት አከባቢ ነው ከ6:00 ሰዓት እስከ 10:00 ሰዓት ምናምን ድረስ ይቅማሉ

**P 4: 12\_Male KIR\_BC\_round .docx - 4:11 [?? ??? ????? ?? ????? 8?30 ??? 1..] (10:10) (Super)**

Codes: [SU\_ Time to use subatnce- Afternoon - Family: 2\_Convenient time and place to use substance] [SU\_ Time to use

subatnce- Weekend - Family: 2\_Conveneient time and place to use susbstance] [SU\_ Time to use subatnce\_ Post exam - Family: 2\_Conveneient time and place to use susbstance]  
No memos

ጫት ደግሞ ከሰዓት ነው በተለይ 8:30 እስከ 11:30 ድረስ በማንኛውም ቀን ደግሞ Special በሆነ ቀን ቅዳሜና እሁድን ይጠቀሙታል። ከዚያ ባለፈ በማንኛውም ቀን 8:00 ሰዓት ነው More የሚጀምሩት ጫት መቃም ማለት ነው በተለ ደሞ በፈተና ማጠናቀቂያ ጊዜ ወይም የማጠናቀቂያ ፈተና በሚኖረ ጊዜ እንዲሁ ይጠቀሙታል

**P 8: 16\_FGD ARID\_Users .docx - 8:31 [?????? ?? ?? ????? ????? 6-10 ?..] (60:60) (Super)**  
Codes: [SU\_ Time to use subatnce- Afternoon - Family: 2\_Conveneient time and place to use susbstance]  
No memos

አብዛኛውን ጊዜ ጫት ሞለለንት አከበቢ 6-10 ሰዓት ሲጋራ ጧት ቀን ማታ በማንኛውም ድረግ ወዳ ማታ ላይ ይሰባሉ ።

**P 9: 17\_Male User\_Adihaki campus.docx - 9:4 [?? ?? ??? (??? 7 ??? ???)] (9:9) (Super)**  
Codes: [SU\_ Time to use subatnce- Afternoon - Family: 2\_Conveneient time and place to use susbstance]  
No memos

ጫት ጫት ቤቶች (ከሞለ 7 ሰዓት ቦኃለ)

**P13: 20\_KIR 1\_ 3rd round interveiew\_Business Compus\_mekelle Univeristy .doc - 13:26 [?? ?? ?? ????? ????? ?? ????? ..] (31:31) (Super)**  
Codes: [SU\_ Time to use subatnce- Afternoon - Family: 2\_Conveneient time and place to use susbstance] [SU\_ Time to use subatnce- all time[for addicted] - Family: 2\_Conveneient time and place to use susbstance]  
No memos

ጫት ጧት ላይ የሚወሰድ የለም። ሲጋ የሚያጨሉ ተማሪዎች ከምግብ በኋላ ከቁርስ በኋላ፣ ከምሳ በኋላ እና ከእራት በኋላ ይወስዳሉ። ከምግብ በፊት ቢወሰድ ሊጎዳ እንደሚችል ግንዛቤው ስላላቸው ማለት ነው። ጫት ደግሞ ከ 8:00 ሰዓት በኋላ እስከ 12 ሰዓት ባለው ጊዜ ነው የሚቆሙት።

---

**Code: SU\_ Time to use subatnce- all time[for addicted] {10-0}**

**P 1: 1\_Female Users FGD in Business college.docx - 1:37 [?? 4:-?? ??? ?timing ?? ?? ???..] (65:65) (Super)**  
Codes: [SU\_ Time to use subatnce- all time[for addicted] - Family: 2\_Conveneient time and place to use susbstance]  
No memos

ኮድ 4-እኔ ችግሩ የtiming ነው ብዬ አላስብም።ምንም ቢዚ ብትሆን ለሱስ የሚሆን ጊዜ አይታጣም።ሱሰኛ ኬሆንክ ማለት ነው የፈለገ አሳይመንት ቢኖርህ ወጥተህ አጭሰህ መመለስ ትችላለህ።አልኮልም ቢሆን አንድ ሰዓት ከሰጠህዉ በቂ ነው፤ይህ አይደለም ችግሩ

**P 3: 11\_M\_IDI\_Male nonuser BC.docx - 3:3 [??? ??? ??? /Must/ ?? ??? ??? ..] (14:14) (Super)**  
Codes: [SU\_ Time to use subatnce- all time[for addicted] - Family: 2\_Conveneient time and place to use susbstance]  
No memos

ሲጋራ ደግሞ መስተ /Must/ ነው ጥዋት ማታም ከሰዓትም ያጭሳሉ

**P 7: 15\_X\_IDI\_Male proctor Ayder.docx - 7:14 [??? ????? ?? ?? ????? ?? ????? ??..] (19:19) (Super)**  
Codes: [SU\_ Time to use subatnce- all time[for addicted] - Family: 2\_Conveneient time and place to use susbstance]  
No memos

ሲጋራ እንኳን ብዙ ጊዜ የተለየ ጊዜ የለውም በተለይም በጣም ለሚያጨሉ።



**P 9: 17\_Male User\_Adihaki campus.docx - 9:3 [??? ??? (???)] (10:10) (Super)**

Codes: [SU\_ Time to use subatnce- all time[for addicted] - Family: 2\_Conveneient time and place to use susbstance]  
No memos

ሲጋራ ሰቆች (ሁሌም)

**P 9: 17\_Male User\_Adihaki campus.docx - 9:11 [??? ????] (23:23) (Super)**

Codes: [SU\_ Time to use subatnce- all time[for addicted] - Family: 2\_Conveneient time and place to use susbstance]  
No memos

ሲጋራ በየቀኑ

**P11: 19\_KIR 1\_ 2nd Ineterbview\_ busness compus\_Mekelle University.docx - 11:1 [?? ???? ???? ???? ???? ???? ????..] (2:2) (Super)**

Codes: [SU\_ Time to use subatnce- all time[for addicted] - Family: 2\_Conveneient time and place to use susbstance]  
No memos

ከዛ ከመጠጡ ቀጥሎ ደግሞ እዛው መጠጡ ላይ ሲጋራም ይጨሳል ፓፍም ይሉበታል ማለት ነው። በጣም ሱሰኛ የሆኑት ደግሞ ጥዋት ከንቅልፋቸው ተነስተው የሚያጨሱ አሉ።

**P11: 19\_KIR 1\_ 2nd Ineterbview\_ busness compus\_Mekelle University.docx - 11:5 [? ???? ???? ???? ? ? ???? ????..] (6:6) (Super)**

Codes: [SU\_ Time to use subatnce- all time[for addicted] - Family: 2\_Conveneient time and place to use susbstance]  
No memos

ያ እንደውም ባለፈው ያለቺኝ እኔ ኮ አሁን ትንሽ ቀነሰልኝ እንጂ የሆነ ቀን አብረን ምግብ በላን እና አጨስ አለጩኛ እና እሱን ሚታወቀው ሰው አይደለም ከዛ እናም በይበልጥ አልቻልኩም አለቀሰረኩ ምናምን ማለት ይህ ሱስ ማለት ማጨስ ትፈልጋለች እና ሁሉ ከበላች በሃላ ያስፈልጋታል ጥዋት ከእንቅልፋቸው ሲነሱ ያስፈልጋቸዋል ከእንቅልፋ እንደተነሱ ቁርስ በልተው ሁለት ሰአት ላይ ያጨሳሉ ደጂ ወጥተው ምናምን ከላስ ከመምጣታቸው በፋት ማለት ነው ከዛ ምሳ ሳኦትም ምናምን ይህ በጣም ሱሰኛ የሆኑት ማለት ነው

**P12: 2\_M\_FGD\_Male user\_BC .docx - 12:15 [????? ?? ???? ???? ???? ????..] (36:36) (Super)**

Codes: [SU\_ Time to use subatnce- all time[for addicted] - Family: 2\_Conveneient time and place to use susbstance] [SU\_ Time to use subatnce- Post exam - Family: 2\_Conveneient time and place to use susbstance]  
No memos

አብዛኛው ጊዜ የሚወመው አርብ አርብ ነው ሲጋራና መጠጥ ደግሞ ሰው ተማሪው ካለው ፋይናልም / finale / ቀጥቶ ሰው ይሄዳል ብር ካለው ማለት ነው ጫት ምናምን ነገር አኽ አረብ ይዘወተራል ብዙ ጊዜ ፈተና ሰሙን ጫት ይቃማል እና ብዙ ጊዜ ዳግም ተማሪው አረብ አረብ ጃምና ነው በሚለው ነው እንጂ የሆነ ብዙ ጊዜ ሰው ገንዘቡ ነው እንጂ የሚያሳራፈው ቀንም የሚመረጥ አይመስለኝም (ትመረጣለህ እንዴ ቀን አንተ?) code 1ን ሲጠይቀው) ብር ካለው በቃ ቀን የሚመረጥ ሰው የለም

**P13: 20\_KIR 1\_ 3rd round interveiew\_Business Compus\_mekelle Univeristy .doc - 13:26 [?? ?? ? ? ???? ???? ???? ????..] (31:31) (Super)**

Codes: [SU\_ Time to use subatnce- Afternoon - Family: 2\_Conveneient time and place to use susbstance] [SU\_ Time to use subatnce- all time[for addicted] - Family: 2\_Conveneient time and place to use susbstance]  
No memos

ጫት ጧት ላይ የሚወስድ የለም። ሲጋ የሚያጨሱ ተማሪዎች ከምግብ በኋላ ከቁርስ በኋላ፣ ከምሳ በኋላ እና ከእራት በኋላ ይወስዳሉ። ከምግብ በፊት ቢወሰድ ሊጎዳ እንደሚችል ግንዛቤው ስላላቸው ማለት ነው። ጫት ደግሞ ከ 8:00 ሰዓት በኋላ እስከ 12 ሰዓት ባለው ጊዜ ነው የሚቆሙት።

**P20: 5\_IDI\_Male user-BC.docx - 20:15 [???? ?? ??? ??? ?? ????? ??? ..] (35:35) (Super)**

Codes: [SU\_ Time to use subatnce- all time[for addicted] - Family: 2\_Conveneient time and place to use susbstance] [SU\_ Time to use subatnce- Weekend - Family: 2\_Conveneient time and place to use susbstance]

No memos

አልኮል እሱ አልፎ አልፎ ነው በየቀኑም የሚጠጡ አሉ አብዛኛው አልፎ አልፎ ነው አብዛኛው ግን ቅዳሜ ነው

**Code: SU\_ Time to use subatnce- Evening {6-0}**

**P 2: 10\_M\_IDI\_Male non user BC.docx - 2:38 [??? ????? ??? ??? ?????? ??? ??..] (49:49) (Super)**

Codes: [SU\_ Time to use subatnce- Evening - Family: 2\_Conveneient time and place to use susbstance]

No memos

እቶም ሰተይቲ ምሽት እየም ዝሰትይዎ በተለይ ካብ 12:30 ንድሓር ከማዚ ፅልምትምት ምስ በለ ሽዑ ይጅሙሩ እሞ ንሳቶም ከዓ ተምሃሮ ስለ ዝኾኑ ካብኡ ድራር በሊዕካ ተመሊስካ ንሽዑ ነገር ዝመፅእ ዝብል ኣተሓሳስባ ኣሎ። ሰቲካ ካብኡ ንድሓር እናሞቓኻ ከኸየድ ምእንቲ ብጊዘኻ 'ውን ከትኣቱ ምእንቲ ዝብል ኣተሓሳስባ ኣሎ። ምሽታ መስተ

**P 2: 10\_M\_IDI\_Male non user BC.docx - 2:42 [???? ??? ??? ??? ??? ?? ??? ??..] (51:51) (Super)**

Codes: [SU\_ Time to use subatnce- Evening - Family: 2\_Conveneient time and place to use susbstance]

No memos

እዚአም ዘይሩ ዘይሩ ድሕሪ ሰዓት እዩ ሓሸሽ ግን ምሽት እዩ ሓዚ ኣብ ውሽጢ ግቢ ተምሃሮ ኣብ ፅልምት ዝበለ ቦታ እንተከይድካ May be ዝኾነ ነገር እናበረሀ ትሪኢ ገሊኡም ዝኾነ ይስሕቡ ኣለው ማለት እዩ ሓዊ ነገር እንታይ እዩ ይብሉኻ ወረቀት ጠቂሊሎም ዝኾነ ነገር የእትው እሞ ይስህቡ ምሽት ምሽት ገለ ይበሃል እዩ እንታይ ኢካ ትዕዘብ May be ስለ እቲ ፀገም ድዩ ምሽት ምሽት ይውሰኹ ዘለው ገለ ዝብል ሪግፀኛ ኣይኮንኩን

**P 3: 11\_M\_IDI\_Male nonuser BC.docx - 3:4 [??? ?????? ??? ?????? ??? ?? ???..] (15:15) (Super)**

Codes: [SU\_ Time to use subatnce- Evening - Family: 2\_Conveneient time and place to use susbstance]

No memos

ድራግ የሚባለው ደግሞ ወደማታ አከባቢ ነው መሰለኝ የሚባለውን ይሄ ሓሸሽ እሱ ወደ ማታ ላይ

**P 3: 11\_M\_IDI\_Male nonuser BC.docx - 3:5 [?? ??? ?????? ?? ?????? ?????? ???..] (16:16) (Super)**

Codes: [SU\_ Time to use subatnce- Evening - Family: 2\_Conveneient time and place to use susbstance]

No memos

አዎ አንድ የተራሳኝ አለ የአልኮል መጠጦች የአልኮል መጠጦች አብዛኛው ሰዓት የሚወስድበት ሰዓት ማታ ላይ ነው ኣሸር (Over) የሚባል አለ

**P 8: 16\_FGD\_ARID\_Users .docx - 8:32 [????? ??? ?????? ??? Over ????? ..] (61:61) (Super)**

Codes: [SU\_ Time to use subatnce- Evening - Family: 2\_Conveneient time and place to use susbstance]

No memos

የአልኮል ውስጥ አብዛኛው ሰዓት Over የሚበል አለ እደዚህ ማቼ ብዙ በጥቼ እየሉ ይሩናል መጠጥ ከጠጡ በኋላ ደግሞ ሴት ይዘማደር ደመጠል

**P24: 9\_IDI\_Female proctor Ayder.docx - 24:17 [?? ?????? ?????? ?? ?????????? ???..] (62:62) (Super)**

Codes: [SU\_ Time to use subatnce- Evening - Family: 2\_Conveneient time and place to use susbstance]

No memos

ደጅ ርግጠኛ አይደለሁም መቸ እንደሚጠቀሙ፤ በግቢ ግን ሲጋራ በተመቻቸ ሰዓት ሌሊትም ቀንም ይገኛሉ ወንዶች ሴቶች እንዲያን አግኝተን አናቅም፤ ጫት ግን አብዛኛውን ጊዜ ምሽት ነው፤ ከ2:00ሰዓት በኋላ ያለው በቀን ስለሚፈሩ ነው መሰለኝ ግቢ ውስጥ መቃም በዶርም ነው የሚጠቀሙት ማታ ማለት ነው።

**Code: SU\_ Time to use subatnce- May month {3-0}**

**P10: 18\_KIR 1\_ 1st interview\_Business campus\_mekelle univeristy.doc - 10:14 [??? ????? ?????? ??? ???? ..] (21:21) (Super)**

Codes: [SU\_ Time to use subatnce- May month - Family: 2\_Conveneient time and place to use susbstance] [who use substnces: GC students - Family: 6\_Who are at risk of practicing subatnce use]

No memos

ወጣት ተማሪዎች በአብዛኛው ተጋላጭ ሲሆኑ ከነባር ተማሪዎች ደግሞ በዚህ ሰዓት ላይ (ግንቦት ወር) ከማንም በላይ ተጠቃሚ ይበዛል። ሳይቅም የነበረ ተማሪ ነው በዚህ ወር ላይ ሱሰኛ ሆኖ የሚወጣው።

**P13: 20\_KIR 1\_ 3rd round interveiew\_Business Compus\_mekelle Univeristy .doc - 13:24 [????? ?? ???? ?????? ????? ??..] (26:26) (Super)**

Codes: [SU\_ Time to use subatnce- May month - Family: 2\_Conveneient time and place to use susbstance] [who use substnces: GC students - Family: 6\_Who are at risk of practicing subatnce use]

No memos

ተጋላጭነት ላይ ባለፈው ከጠቀስኩት በተጨማሪ አሁን ላይ ተመራቂ ተማሪዎች በስፋት ተጠቃሚ መሆናቸው ተረድቻለሁ። በመጨረሻ አመት ላይ በተለይ በመጨረሻ ወራት ላይ ተጠቃሚነታው ይጎላል። ግንቦት ወር ላይ በተለይ የጫት ተጠቃሚ ተባራ ብዛት በጣም ይጨምራል። ሌላ ተመራቂ ተማሪዎች በዚህ ሰዓት በጣም ብዙ ናው።

**P13: 20\_KIR 1\_ 3rd round interveiew\_Business Compus\_mekelle Univeristy .doc - 13:25 [??? ?? ???? ?????? ????? ?? <????..] (29:29) (Super)**

Codes: [SU\_ Time to use subatnce- May month - Family: 2\_Conveneient time and place to use susbstance]

No memos

ዎ። ምን ያላሉ መሰለህ ግንቦት ወር <<የቀርጫ ወር>> ይሉታል። ምን ለማለት መሰለህ የግድ ሁሉም መቃም ያለበት ወር እንደ ማለት ነው። ግድ በዚህ ወር ምረቃ እየደረሰ ስለሆነ የቀርጫ ወር ነው የቀርጫ ሳምንት ነው ይባላል።

**Code: SU\_ Time to use subatnce- Mornning {2-0}**

**P 2: 10\_M\_IDI\_Male non user BC.docx - 2:39 [??? ?????? ??? ?? ??? ??? '?? ..] (49:49) (Super)**

Codes: [SU\_ Time to use subatnce- Mornning - Family: 2\_Conveneient time and place to use susbstance]

No memos

ሺጋራ እንተኮይኑ ወልፊ ስለ ዝቸነ ንግሆ 'ውን ክሰቲ እዩ ምሽት 'ውን ክሰቲ እዩ። በተለይ ንግሆ ንግሆ ተላኢሎም ይሰሕቡ።ቅድሚ Class ምእታዎም ገለ ክስሕቡ አለዎም ። እንተዘይሲሒቦም ዓይኖም ቀይሕ ዝቸነ ተምሃሮ ይርካ ብጣዕሚ እዮም ዘብሉ ዝድንዝዙ ጋላታት ናይ ሺጋራ Side effete ትራኣሎም ማለት እዩ። በርግፅ ገለ ገሊኡም እንነየው ዋላ ብተከታታሊ ዝስሕቡ ሱቅ ኢሎም ግን እዚኡም ወሰንቲ እዩም።

**P 7: 15\_X\_IDI\_Male proctor Ayder.docx - 7:12 [????? ?? ??? ?? ??? ?????? ..] (19:19) (Super)**

Codes: [SU\_ Time to use subatnce- Mornning - Family: 2\_Conveneient time and place to use susbstance]

No memos

አብዛኛው ጊዜ ሲጋራ ጧት ሌሊት ተነስቶ ሰራተኛ በሌለበት አይቶ የፎቆ ሰገነት ላይ ወጥቶ እዛ ያጨሳሉ ወደ ትምህርት

ከመሄዳቸው በፊት ማለት ነው። ከዛም በምሳ ሰዓት አካባቢ በ6:00-8:00 ሰዓት ባለው ጊዜ

**Code: SU\_ Time to use subatnce- Weekend {20-0}**

**P 1: 1\_Female Users FGD in Business college.docx - 1:13 [?? 4:-????? ???? ???? ???? ..] (40:40) (Super)**

Codes: [Process of getting addicted (from initiation to addiction) - Family: 5\_Process of getting addicted for substances] [SU\_ Time to use subatnce- Weekend - Family: 2\_Conveneient time and place to use susbstance]

No memos

ከድ 4 -መጀመርያ ሲጀመር እንደዚህ ዓይነት ነገር weekend ላይ ነው የምናዘወትረው። ምክንያቱም ሙሉ ፍሪ ታይም የሚኖረን ቅዳሜ እና እሁድ ነው። ነገር ግን በዚህ ይጀምር እና ከዛ ወደ አዲስከን ከተለወጠ በኋላ ግን ታይም የማይመርጥበት ጊዜ አለ፤ ለምሳሌ ሲጋራ addicted የሆነ ሰው ከክላስ በፊት አጭሶ የሚገባበት ሁኔታ አለ። ያወ መጠጥ ደግሞ እንደ ልጁ ከሆነ ከሰዓተ በኋላ ማታ ላይ ብቻ ታይም የማይመርጥበት ጊዜ ሲደርስም አዲስከን ላይ ይደርሳል።

**P 2: 10\_M\_IDI\_Male non user BC.docx - 2:29 [??? ???? ?? Program ???? ??????] (38:38) (Super)**

Codes: [SU\_ Time to use subatnce- Weekend - Family: 2\_Conveneient time and place to use susbstance]

No memos

እቶም ተምሃሮ ከም Program ቅዳምን ስንበትን እየም ዝወፁ ቀዳም ይወፁ አብኡ ሓዲሮም ሰንበት ንምዕራፍ ወይን ውን ይሰትዩ እየም ግን እቲ ወይን ኩሉ ግዜ አይሰትዩን ሐዚ ከምቲ ዝበልኩካ ንምስካር ካት ገይሮም ይሰትይዎ ካብኡ የስክሮም።

**P 4: 12\_MAlE KIR\_BC\_round .docx - 4:3 [???? ?? ??? ??? ??????? ???? Fi..] (4:4) (Super)**

Codes: [SU\_ Time to use subatnce- Weekend - Family: 2\_Conveneient time and place to use susbstance]

No memos

እንትን ደም ሌሎች ፈተና በሚደርስበት ሰዓት Final ላይ በሚደረስበት ሰዓት እነዚህ በተለይ እነዚህ ቀናቶች ማለት ነው እነዚህ ቀናቶች More ይጠቀማሉ።

**P 4: 12\_MAlE KIR\_BC\_round .docx - 4:10 [???? ?? ??????? ?????? ?????? ?..] (9:9) (Super)**

Codes: [SU\_ Time to use subatnce- Weekend - Family: 2\_Conveneient time and place to use susbstance]

No memos

ከከተማ ነው የሚያመጣቸው ቀናቶችን በተመለከተ አልኮል መጠጦች በተለይ የሚጠቀሙበት ቀን ቅዳሜ ነው። እንደውም ሌላም ስመ አለው Over ምናምን የሚሉት ነው። እና በነዚህ ሰብብ ነው ይወጡበታል ቀኑ ማለት ነው።

**P 4: 12\_MAlE KIR\_BC\_round .docx - 4:11 [?? ??? ???? ?? ????? 8?30 ??? 1..] (10:10) (Super)**

Codes: [SU\_ Time to use subatnce- Afternoon - Family: 2\_Conveneient time and place to use susbstance] [SU\_ Time to use subatnce- Weekend - Family: 2\_Conveneient time and place to use susbstance] [SU\_ Time to use subatnce\_ Post exam - Family: 2\_Conveneient time and place to use susbstance]

No memos

ጫት ደግሞ ከሰዓት ነው በተለይ 8:30 እስከ 11:30 ድረስ በማንኛውም ቀን ደግሞ Special በሆነ ቀን ቅዳሜና እሁድን ይጠቀሙታል። ከዚያ ባለፈ በማንኛውም ቀን 8:00 ሰዓት ነው More የሚጀምሩት ጫት መቃም ማለት ነው በተለይ ደም በፈተና ማጠናቀቂያ ግዜ ወይም የማጠናቀቂያ ፈተና በሚኖረ ግዜ እንዲሁ ይጠቀሙታል

**P 4: 12\_MAlE KIR\_BC\_round .docx - 4:12 [????? ??? ??? ???? ????... ?????? ..] (10:10) (Super)**

Codes: [SU\_ Time to use subatnce- Weekend - Family: 2\_Conveneient time and place to use susbstance]

No memos

የአልኮል መጠጥ ቅዳሜ ነው። እኔ... ተማሪዎች የአልኮል መጠጥን በይበልጥ ይጠቀሙታል ወይም የሚጠቀሙበት ቀን ነው

ቅዳሜ ማለት ነው።

**P 6: 14\_X\_FGD male non-user at Ayder docx.docx - 6:50 [??? ? ?? ?????? ?????? ?????..] (69:70) (Super)**

Codes: [Assumed purpose to strat substance use- Entertainment - Family: 4\_Percieved importance of subatance use by users] [SU\_ Time to use subatnce- Weekend - Family: 2\_Conveneient time and place to use susbstance] [who use substnces: Male Vrs Female students - Family: 6\_Who are at risk of practicing subatnce use]  
No memos

ሴቶች ት ወደ አልኮልላይ እንዲያዘነብሉ ሚያደርጋቸው ሁኔታዎች አሉ

ተብሎዋል ግን የመጀመርያው ነገር ፖስት እያነበብክ ትቆይ እና ከዛ ስት ስትቆይ የሆነ ነገር ሻይቡና ሳትባባል ይደብራል አይደል ከዛ እንሂድ አንድ አንድ ይባላሉ ያው እንግዲህ ሲጠጡ ያድራሉ ነው እንጂ አብዛኛው ጊዜ medicine ን እኔ medicine ስለሆንኩ በጣም በፈተና ስኣት አርብአርብ ወጥተው ቅዳሜና እሁድ ።

**P 6: 14\_X\_FGD male non-user at Ayder docx.docx - 6:71 [??? ?? ??? ??? ?? ??? ??? ?? ?..] (101:101) (Super)**

Codes: [SU\_ Time to use subatnce- Weekend - Family: 2\_Conveneient time and place to use substance]  
No memos

የጫቱ ግን በቀን ሁለት ጊዜ ወይም አንድ ጊዜ ሊሆን ይችላል ጥዋት ማታ ብዙን ጊዜ የሚጠቀሙት ማታ አከባቢ ነው እና ብዙ ጊዜ frequency የሚጨምረው ደግሞ ቅዳሜና እሁድ አርብ ማታ ጀምሮ በተላይ የሁሉም ግቢ ማለት ይቻላል የአራድም ብትል የቢዝነስ ብትል ማቀው እዚህ ግቢ ለምሳሌ አርብ ማታ ጀምሮ እስከ ሰኞ ጥዋት

**P 6: 14\_X\_FGD male non-user at Ayder docx.docx - 6:72 [??? ?? ?? ??? ????? ????? ??? ??..] (101:101) (Super)**

Codes: [SU\_ Time to use subatnce- Weekend - Family: 2\_Conveneient time and place to use substance]  
No memos

አርብ ማታ ብዙ ተማሪ ይወጣል በተላይ ቅዳሜ የሳምንቱ ምርጥ ቀን ነች ብዙ ተማሪ ጥዋት ተዘጋጅቶ ይውላል ምናምንምናምን ከዛ ማታ ከወደ ናይት ክለቡ ብዙ ጊዜ የሚሄዱ ቅዳሜ ማታ ብዙ ጊዜ ያው research የሚሰራ ሰው እዛ ሂደቱ ቢያይ በጣም ገራሚ ነው ቅዳሜ ማታ ለእሁድ የሚያነጋው

**P 6: 14\_X\_FGD male non-user at Ayder docx.docx - 6:73 [??? ?? ????? ?? ??? ??? ??? ???..] (102:103) (Super)**

Codes: [SU\_ Time to use subatnce- Weekend - Family: 2\_Conveneient time and place to use substance]  
No memos

ቅዳሜ ማታ ለእሁድ

አዎ የዛኔ ሁሉም ተማሪ ሲጋራ ይጠቀማል ብዙ ነገር ያው እንደሱ ነው እና አርብና ቅዳሜ እንትን ነው እሁድ ብዙም አይደለም ክላስ ስላለ ሰኞ ብዙም የሚጠቀም የለም ለመቅጣት ካልፈለገ እሁድ ብዙም አይደለም የእረፍት ቀን ነች ያው ግን እንዳልኩህ ነው ፍሪኮንሲው ሲጋራ በየቀኑ ነው ሚጨምረው በደንም የሚጠቀሙት ግን ግን አርብ ማታ ቅዳሜ weekend ሲሆን

**P 6: 14\_X\_FGD male non-user at Ayder docx.docx - 6:75 [?? ??? ????? ??? final ????? ? ?..] (108:108) (Super)**

Codes: [SU\_ Time to use subatnce- Weekend - Family: 2\_Conveneient time and place to use substance]  
No memos

ጫት ፈተና ባለበት አሁን final በቀረበ ሊ ያጠኑ ሁሉ የሚወስዱም ይኖራሉ እንዳለው ከሃረር ድራዳዋ ምናምን የመጡ ቢያንስ ሳምንት ሊጠቀሙ ይችላሉ ጫት ቅዳሜ እና እሁድ almost ከሃሙስ አርብ እንኳን ደህና ነው ቅዳሜና እሁድ ግን ብዙ ሰው በግቢው የለም እዛጋር ሂዶ ጫቱ ይቅማል ቤት የተከራየም ሰው በይቀን ስሃል

**P 9: 17\_Male User\_Adihaki campus.docx - 9:10 [?? ????? ?? ?????? ????? ?? ?????..] (22:22) (Super)**

Codes: [SU\_ Time to use subatnce- Weekend - Family: 2\_Conveneient time and place to use substance]  
No memos

ጫት በየቀኑ ነው በሰምንትም የሚቀመጡ አሱ በየደርፉር አከበቢ ግን በየቀኑ ነው

**P 9: 17\_Male User\_Adihaki campus.docx - 9:12 [???? ?? ?????? ??? ?? ???????] (24:24) (Super)**

Codes: [SU\_ Time to use subatnce- Weekend - Family: 2\_Conveneient time and place to use susbstance]

No memos

አስከል ግን በየሰምንቱ ቀደሜ ነው የሚዘወትረው

**P12: 2\_M\_FGD\_Male user\_BC .docx - 12:16 [????? ?? ??? ???? ???? ???? ??.] (36:36) (Super)**

Codes: [SU\_ Time to use subatnce- Weekend - Family: 2\_Conveneient time and place to use susbstance] [SU\_ Time to use subatnce\_ Post exam - Family: 2\_Conveneient time and place to use susbstance]

No memos

ባብዛኛው ግን የሆነ ኖርማሊ ፈተና ሲዳረስና አረብ አረብ ሰው ለመቃም ይሳባል እሁድ እሁድ ግዜው አይገፋም በሚል የሆነ ክላስ የሌለባቸው ሰአቶች ምናምን ነገር ራሱ ፈተና አለቀ ብሎ ራሱን ለማስደሰት ምናምን በዛ ሰዓት ነው እንጂ ተማሪው ብርካለው ሌሊትም ያደረገዋል፡

**P12: 2\_M\_FGD\_Male user\_BC .docx - 12:20 [????? ?? ?????? ?? ?? ???? ???? ..] (38:38) (Super)**

Codes: [SU\_ Time to use subatnce- Weekend - Family: 2\_Conveneient time and place to use susbstance]

No memos

አጠቃቀሙ ሁሉ አብዛኛው ግዜ ግን አረብና ቅዳሜ ማታ ግን የተለየ ነው ምንም ስለሌለው ከክላስ ነፃ ስለሆነይጠቀማል ሲጋራ ግን ያው በጣማበት ሰዓት ጥዋትም ሄዶ ወጥቶ ያጨሳል፡፡

**P19: 4\_IDI\_Male user BC.docx - 19:6 [?? ??? Specially ??? ??? ?? ??.] (21:21) (Super)**

Codes: [SU\_ Time to use subatnce- Weekend - Family: 2\_Conveneient time and place to use susbstance]

No memos

አዎ መጠጥ Specially አሁን ቅዳሜ ቢቃ የመጠጥ ቀን ተብሎ እንደሚታሰው እንደ ግቢ ሁኔታ ቅዳሜ አሁን Over የሚባል አለ አብዛኛው ተማሪ ግቢ ማደሩ ራሱ ያጠራጥራሃል እና ቅዳሜ የዕረፈት ቀን ተብሎ ስለሚታሰብ ሁሉ ለመጠጣት ብቻ የሚ----- ዕረፍት የሚገኝ በመጠጣት ብቻ ይመስለሃልና መጠጥም አለ እዛ፡፡

**P19: 4\_IDI\_Male user BC.docx - 19:9 [?? ?????? ?/? ?? already ???? ..] (33:33) (Super)**

Codes: [SU\_ Time to use subatnce- Weekend - Family: 2\_Conveneient time and place to use susbstance]

No memos

አዎ ትምህርተማ ት/ት ነው already አላማህ እሱ ስሉኑ ከዛ ወጣ ያለ ባህሪ ላይኖር ይችላል specially ቅዳሜና እሁድ ተገን አድረህ እንደዛ ነው የሚበዙትን more የሚበዘህትን

**P20: 5\_IDI\_Male user-BC.docx - 20:15 [???? ?? ??? ???? ???? ???? ..] (35:35) (Super)**

Codes: [SU\_ Time to use subatnce- all time[for addicted] - Family: 2\_Conveneient time and place to use susbstance] [SU\_ Time to use subatnce- Weekend - Family: 2\_Conveneient time and place to use susbstance]

No memos

አልኮል እሱ አልፎ አልፎ ነው በየቀኑም የሚጠጡ አሉ አብዛኛው አልፎ አልፎ ነው አብዛኛው ግን ቅዳሜ ነው

**P21: 6\_F\_IDI with Female Non User at Ayder.docx - 21:1 [?? ??? ? ?? ?? ???? ???? ? ? ..] (13:13) (Super)**

Codes: [SU\_ Time to use subatnce- Weekend - Family: 2\_Conveneient time and place to use susbstance]

No memos

እወ ይህቡ ዩ እወ አብ ከተማ ወዲእካ ነይሩ ዩ ከተማ እንተከድካ በተለይ ኩሉ ደቂ አንስቲዮ ይኩን ደቂ ተባዕትዮ ኩሎም ምጥቃም ዮም ::በተለይ ቀዳም ምናምን ዓርቢ ዕፅው አቢልና ት/ቲ በተለይ ከተማ እንተከድካ አብኡ ይፀንሐካ ዋላ ዓይደር ብብዘሐ አብ ናይ አሪድ ተምሃሮ አብኡ ትርኽበን ኢኻ

**P24: 9\_IDI\_Female proctor Ayder.docx - 24:13 [?? ??? ????? ?? ????? ??? ???..] (50:50) (Super)**

Codes: [SU\_ Time to use subatnce- Weekend - Family: 2\_Conveneient time and place to use susbstance]

No memos

ደጅ ማደር የተለመደ ነው በተለይም ቅዳሜና እሁድ ሁሉ ተማሪ ወደ ጭፈራ ይሄዳል። አዳር ሲሆን ለምሳሌ 3:00 ሰዓት ነው የምገባው አሁን ሲገባ የሚያየው ምንድነው እየወጡ ነው ወደ ውጭ፤ ሁሉም ነባርም አዲስም እንዲያውም ድሮ አዲስ ተማሪ ብዙ አይወጣም ነበር አሁን ግን ሁሉም እኩል ናቸው። አትለያቸውም ማን አዲስ ማን ነባር እንኳን ብታውቅ፤ ውጭ ለማደር ግን ልዩነት የለም በተለይም በሴቶች።

---

**Code: SU\_ Time to use subatnce\_ Post exam {4-0}**

**P 4: 12\_MALE KIR\_BC\_round .docx - 4:11 [?? ??? ????? ?? ????? 8?30 ??? 1..] (10:10) (Super)**

Codes: [SU\_ Time to use subatnce- Afternoon - Family: 2\_Conveneient time and place to use susbstance] [SU\_ Time to use subatnce- Weekend - Family: 2\_Conveneient time and place to use susbstance] [SU\_ Time to use subatnce\_ Post exam - Family: 2\_Conveneient time and place to use susbstance]

No memos

ጫት ደግሞ ከሰዓት ነው በተለይ 8:30 እስከ 11:30 ድረስ በማንኛውም ቀን ደግሞ Special በሆነ ቀን ቅዳሜና እሁድን ይጠቀሙታል። ከዚያ ባለፈ በማንኛውም ቀን 8:00 ሰዓት ነው More የሚጀምሩት ጫት መቃም ማለት ነው በተለ ደሞ በፈተና ማጠናቀቂያ ጊዜ ወይም የማጠናቀቂያ ፈተና በሚኖረ ጊዜ እንዲሁ ይጠቀሙታል

**P12: 2\_M\_FGD\_Male user\_BC .docx - 12:15 [????? ?? ????? ??? ??? ?? ?????..] (36:36) (Super)**

Codes: [SU\_ Time to use subatnce- all time[for addicted] - Family: 2\_Conveneient time and place to use susbstance] [SU\_ Time to use subatnce\_ Post exam - Family: 2\_Conveneient time and place to use susbstance]

No memos

አብዛኛው ጊዜ የሚወመው አርብ አርብ ነው ሲጋራና መጠጥ ደግሞ ሰው ተማሪው ካለው ፋይናልም / finale / ቀጥቶ ሰው ይሄዳል ብር ካለው ማለት ነው ጫት ምናምን ነገር አኽ አረብ ይዘወተራል ብዙ ጊዜ ፈተና ሰሙን ጫት ይቃማል እና ብዙ ጊዜ ዳግም ተማሪው አረብ አረብ ጃምና ነው በሚለው ነው እንጂ የሆነ ብዙ ጊዜ ሰው ገንዘቡ ነው እንጂ የሚያሳራፈው ቀንም የሚመረጥ አይመስለኝም (ትመረጣለህ እንዴ ቀን አንተ?) code 1ን ሲጠይቀው) ብር ካለው በቃ ቀን የሚመረጥ ሰው የለም

**P12: 2\_M\_FGD\_Male user\_BC .docx - 12:16 [????? ?? ??? ????? ??? ????? ??..] (36:36) (Super)**

Codes: [SU\_ Time to use subatnce- Weekend - Family: 2\_Conveneient time and place to use susbstance] [SU\_ Time to use subatnce\_ Post exam - Family: 2\_Conveneient time and place to use susbstance]

No memos

ባብዛኛው ግን የሆነ ኖርማል ፈተና ሲዳረስና አረብ አረብ ሰው ለመቃም ይሳባል እሁድ እሁድ ጊዜው አይገፋም በሚል የሆነ ክላስ የሌለባቸው ሰአቶች ምናምን ነገር ራሱ ፈተና አለቀ ብሎ ራሱን ለማስደሰት ምናምን በዛ ሰዓት ነው እንጂ ተማሪው ብር ካለው ሌሊትም ያደረገዋል፡

**P12: 2\_M\_FGD\_Male user\_BC .docx - 12:19 [??? ?? ??? ??? ????? ??? ?? ???..] (38:38) (Super)**

Codes: [SU\_ Time to use subatnce\_ Post exam - Family: 2\_Conveneient time and place to use susbstance]

No memos

አንዱ ነዱ ዳግም ፈተና ከጨረሰ በኋላ ዘሬ ከተፈተነ ለማታው ሂደ ቅመ ጨብሶ ይመጣል ማለት ነው
